# Supplementary material
Source: HighWire-hosted journal article supplement (https://bjgpopen.org/highwire/filestream/4602/field_highwire_adjunct_files/0/Figures_BJGPO.2021.0148.pdf)

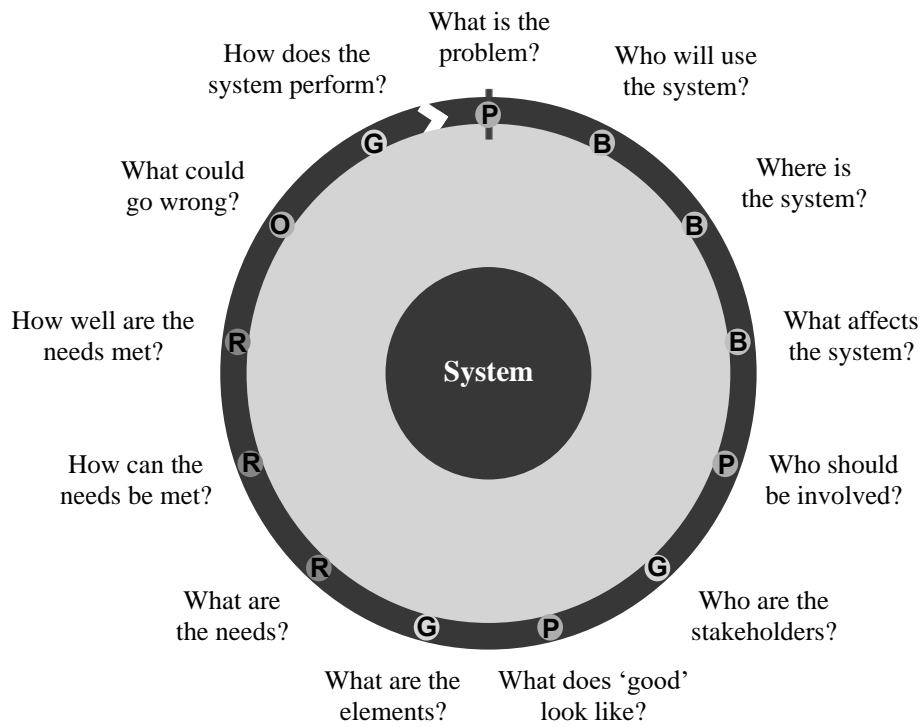

**Figure 1.** A systems approach framed as an iterative series of questions.

B = people perspective. G = systems perspective. R = design perspective. O = risk perspective. P = systems approach 'project questions'.

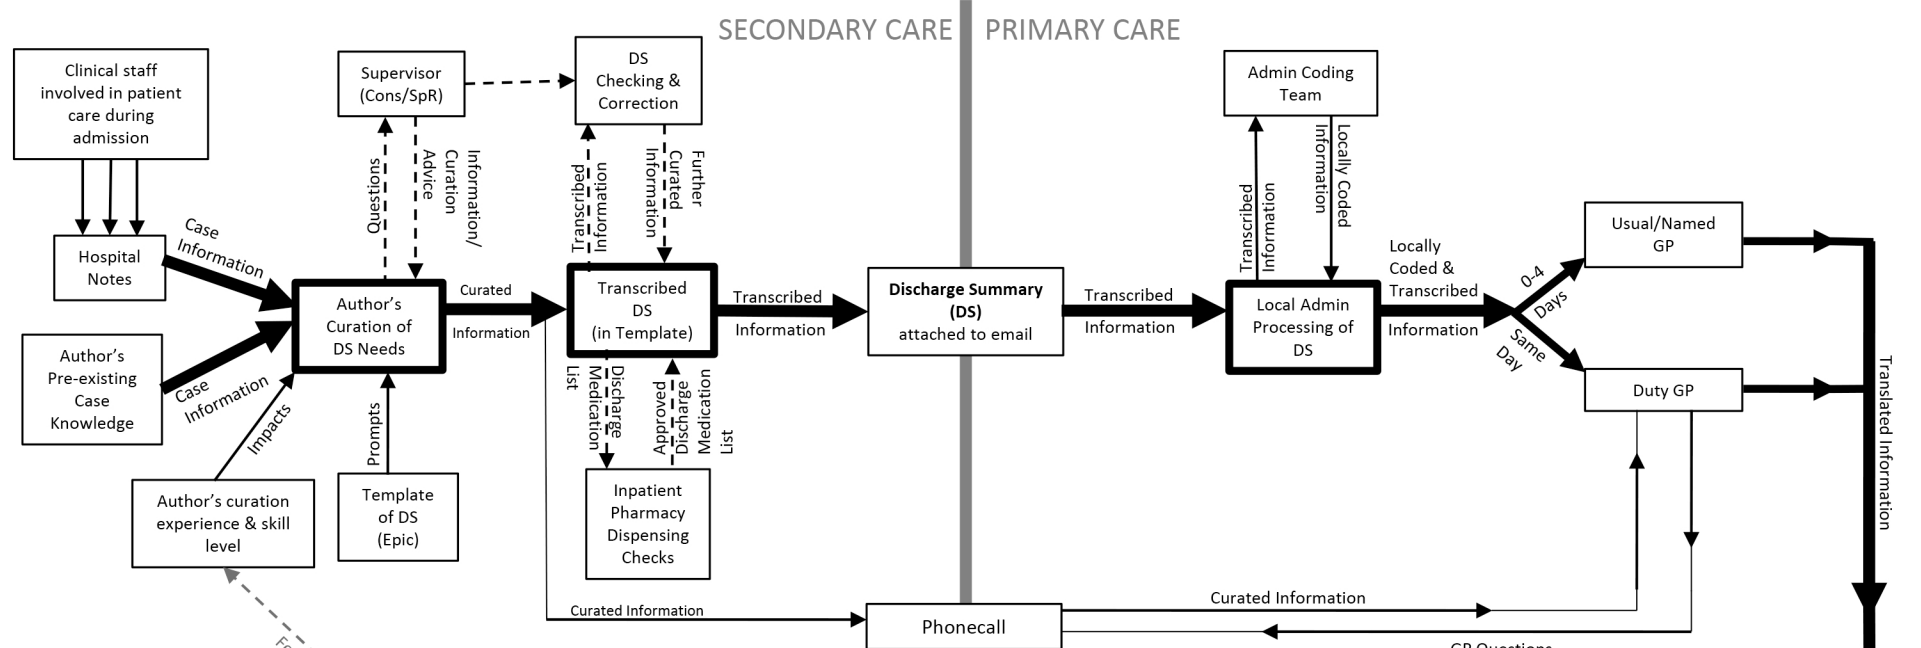

CREATION

RECEPTION

RESOLUTION

INTERPRETATION & ACTION

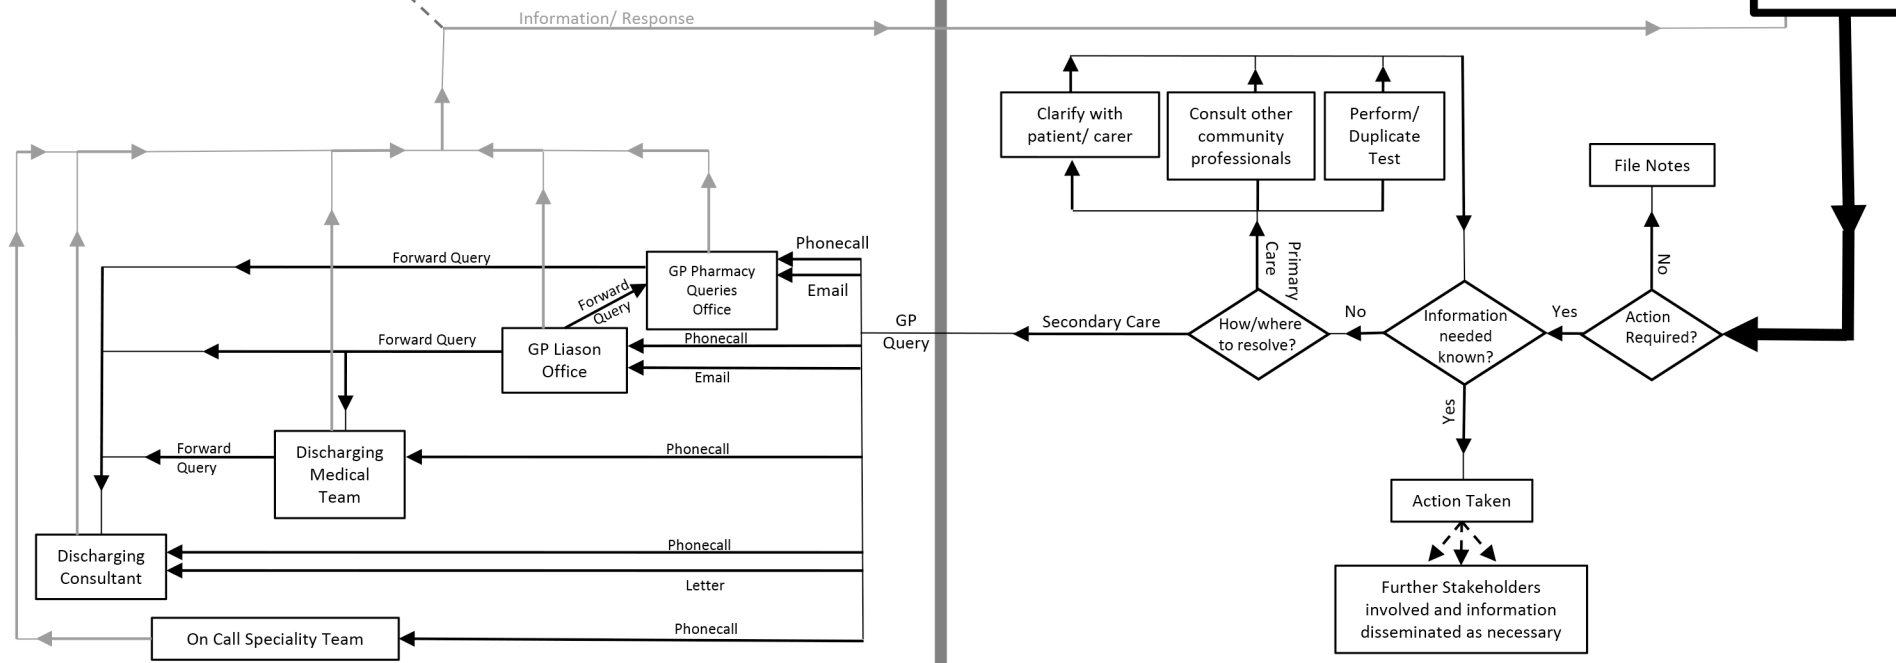

1. The **Creation** of the message in the hospital: assimilation, and curation of the discharge summary, with the option for a supplementary telephone call to the GP.
2. The **Reception** of the message: uploading and coding the information and forwarding to the relevant GP.
3. As the GP gains understanding by **Interpretation** of the message, they may personally take or delegate **Action**. Missing information issues can be tackled within the primary care remit.
4. **Resolution** of an informational deficit can be undertaken via secondary care, either directly to clinicians via phone or email, indirectly via the team's speciality 'on call doctor' or the GP liaison office, or using the GP pharmacy queries service. There is potential for feedback to reach the original author.

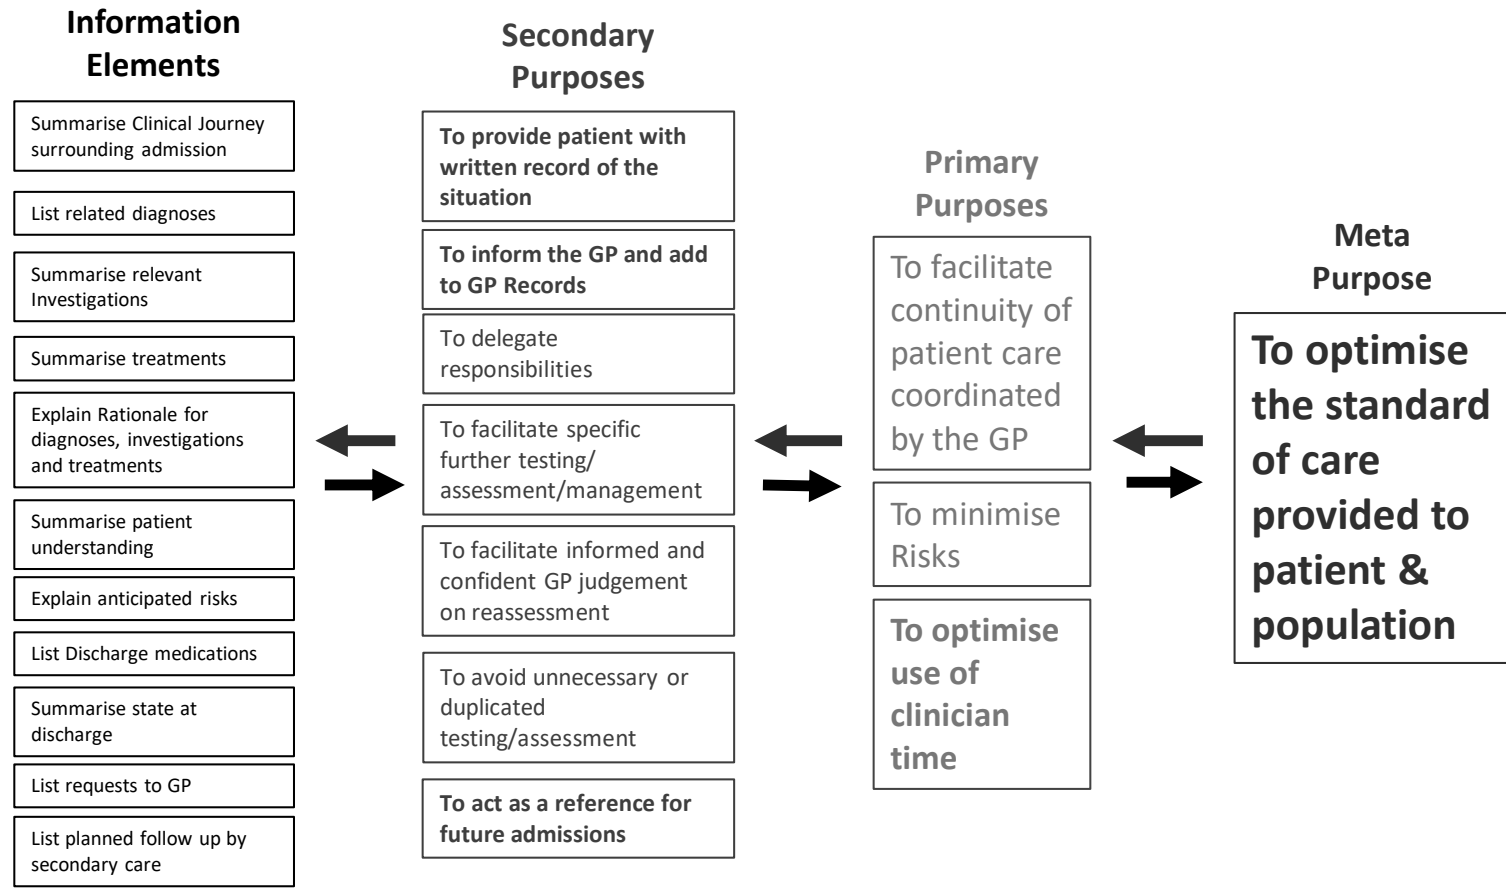

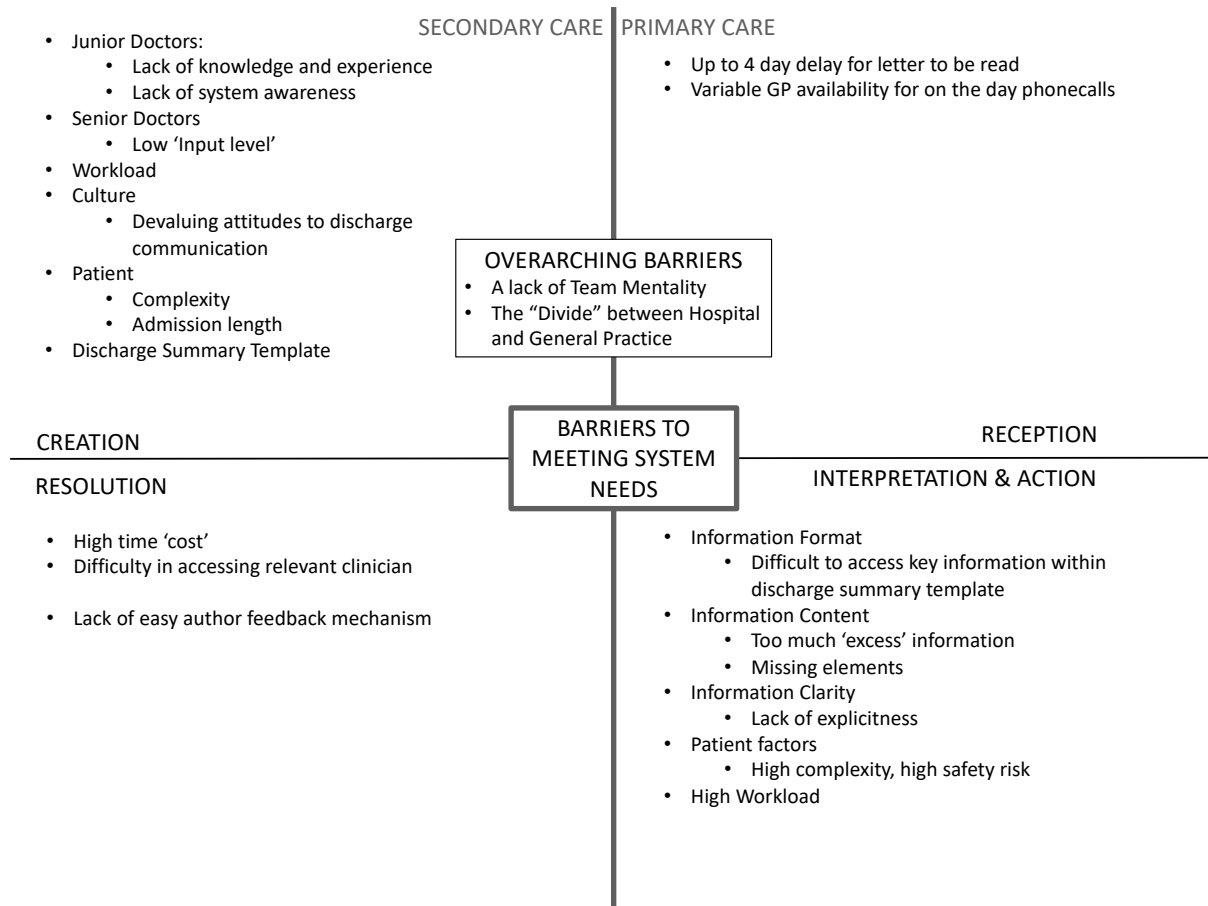

Supplement: Figures_BJGPO.2021.0148.pdf [file Figures_BJGPO.2021.0148.pdf]
